# Supplementary material
Source: publisher figshare collection journal article supplement (https://acs.figshare.com/ndownloader/files/22184604)
Supplement: Supplementary file 1 [file 22184604]

## *Supporting Information*

### **Overcurrent electrodeposition of fractal plasmonic black gold with broadband absorption for excitation-immune SERS**

*Renpeng Yu,<sup>†</sup> Jingyu Wang,<sup>‡</sup> Mei Han,<sup>†</sup> Mengyao Zhang,<sup>†</sup> Pei Zeng,<sup>§</sup> Weiqi Dang,<sup>†</sup> Jianfang Liu,<sup>†</sup> Zhilin Yang,<sup>\*,‡</sup> Jiawen Hu,<sup>\*,†</sup> and Zhongqun Tian<sup>&</sup>*

<sup>†</sup>State Key Laboratory for Chemo/Biosensing and Chemometrics, Hunan Key Laboratory of Two-Dimensional Materials, and College of Chemistry and Chemical Engineering, Hunan University, Changsha 410082, China

<sup>‡</sup>Department of Physics, Research Institute for Biomimetics and Soft Matter, Xiamen University, Xiamen 361005, China

<sup>§</sup>School of Physics and Electronics, State Key Laboratory of Advanced Design and Manufacturing for Vehicle Body, Hunan University, Changsha 410082, China

<sup>&</sup>State Key Laboratory for Physical Chemistry of Solid Surfaces and Department of Chemistry, Xiamen University, Xiamen 361005, China

#### **Supplementary Figures**

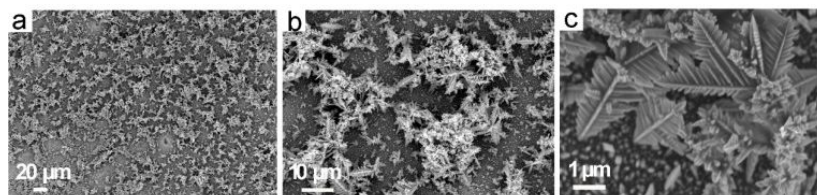

**Figure S1.** (a-c) SEM images for the B-Au with different magnifications.

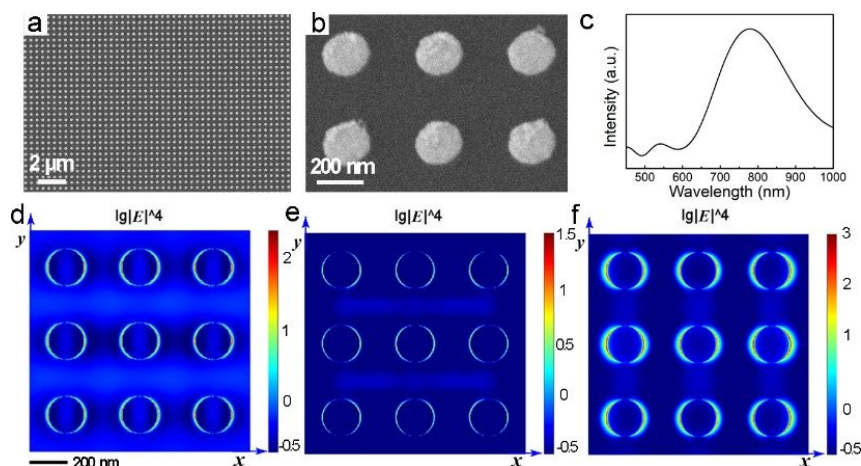

**Figure S2.** (a, b) SEM images for Au nanodisk array with different magnifications and (c) corresponding FDTD-simulated scattering spectrum; field distributions on Au nanodisk excited at (d) 532, (e) 633 (f) 785 nm simulated using 3D-FDTD method.

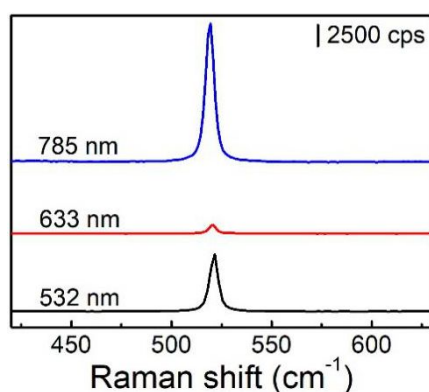

**Figure S3.** Raman spectra of silicon wafer excited using 532, 633, and 785 nm laser for a single 1-s accumulation with the power of each laser attenuated to 10%.

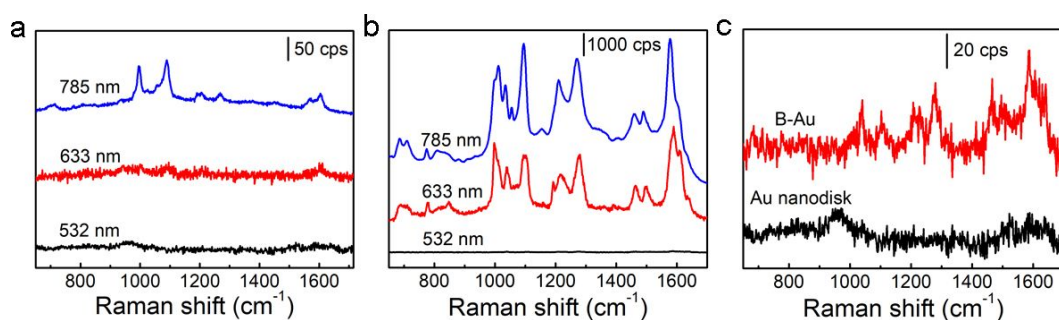

**Figure S4.** Normalized SERS spectra of 4-MPY on (a) Au nano-disk array and (b) B-Au at different excitation and (c) SERS spectra of 4-MPY on Au nano-disk and

B-Au at 532 nm excitation.
